# Supplementary material
Source: Research Square preprint supplement (doi:10.21203/rs.3.rs-9657897/v1)
Supplement: Supplementary file 1 [file 88f6933145fdd89aa6066473.docx]

# Supplement 1. STROBE Checklist for Cohort Studies

The Strengthening Reporting of Observational Studies in Epidemiology (STROBE) statement provides a 22-item checklist for transparent reporting of observational research. The checklist below maps each STROBE item to the corresponding section of this manuscript.

| **STROBE Item** | **Recommendation** | **Manuscript Location** |
| --- | --- | --- |
| 1a | Title and abstract — observational design indicated | Title page; Abstract |
| 1b | Abstract — informative and balanced summary | Abstract |
| 2 | Introduction — background and rationale | Section 1; Section 1.1 |
| 3 | Introduction — specific objectives/hypotheses | Section 1, final paragraph |
| 4 | Methods — study design | Section 2.1 |
| 5 | Methods — setting, locations, dates of recruitment, follow-up, data collection | Section 2.2; Section 2.4 |
| 6a | Methods — eligibility criteria, sources, methods of selection | Section 2.2 |
| 6b | Methods — for matched studies, matching criteria (n/a — single-arm) | n/a |
| 7 | Methods — variables (outcomes, exposures, confounders, modifiers) | Section 2.3; Section 2.5 |
| 8 | Methods — data sources/measurement methods for each variable | Section 2.2 Data Collection Protocol; Section 2.4 |
| 9 | Methods — efforts to address potential sources of bias | Section 2.2; Section 2.6; Section 4.4 |
| 10 | Methods — study size determination | Section 2.2 (convenience sample, full enrolled program completers) |
| 11 | Methods — quantitative variables and groupings | Section 2.5; Section 2.6 |
| 12a | Methods — statistical methods, including those for confounding | Section 2.6 |
| 12b | Methods — methods to examine subgroups and interactions (n/a — single arm) | n/a |
| 12c | Methods — how missing data were addressed | Section 2.2 (complete-case analysis by inclusion criterion) |
| 12d | Methods — analytical methods to account for sampling strategy | Section 2.6; Section 4.4 selection-attrition |
| 12e | Methods — sensitivity analyses | Section 2.6 (descriptive comparison to ITT comparator) |
| 13a | Results — numbers at each stage of study | Section 3.1 |
| 13b | Results — reasons for non-participation | Section 4.4 selection-attrition (acknowledged as not systematically captured) |
| 13c | Results — flow diagram | See Figure 1 (CONSORT-style flow diagram, available on request) |
| 14a | Results — characteristics of participants and exposures, potential confounders | Section 3.1; Table 1 (baseline characteristics, available on request) |
| 14b | Results — number of participants with missing data per variable | All 503 had complete data by the inclusion criterion |
| 14c | Results — follow-up time | Section 3.1 (mean 5.4 months; cohort defined by 6-month completion) |
| 15 | Results — outcome data, numbers, and summary measures over time | Section 3.2; Section 3.3; Section 3.4; Tables 1–3 |
| 16a | Results — unadjusted estimates and confounder-adjusted estimates | Section 3 (unadjusted descriptive only; no inferential testing) |
| 16b | Results — boundaries when continuous variables categorized (n/a) | n/a |
| 16c | Results — translation of relative-risk estimates into absolute-risk (n/a) | n/a |
| 17 | Results — other analyses (subgroups, interactions, sensitivity) (n/a) | n/a — single arm, no inferential testing |
| 18 | Discussion — key results summarizing study objectives | Section 4.1 |
| 19 | Discussion — limitations, sources of bias, magnitude, and direction of bias | Section 4.4 |
| 20 | Discussion — interpretation considering objectives, limitations, multiplicity, similar studies | Section 4.2; Section 4.3; Section 4.5 |
| 21 | Discussion — generalizability | Section 4.4 (Generalizability bullet) |
| 22 | Other — funding sources, role of funders, original study | Title page, Statements, and Funding section in Declarations |

***Note.*** *Items marked 'n/a' do not apply to a single-arm observational cohort design. Items referencing 'available on request' refer to data and figure assets that are available from the corresponding author and may be incorporated into the manuscript or supplementary materials before submission.*
